# Supplementary material for: A general strategy to in situ synthesize hollow metal sulfide/MOF heterostructures for high performance supercapacitors
Source: Royal Society of Chemistry journal article supplement (doi:10.1039/d3dt01484c), 2023-01-01
Supplement: d3dt01484c1.pdf [file d3dt01484c1.pdf]

## Supporting Information

### **A general strategy to in-situ synthesize hollow metal sulfide/MOF heterostructure for high performance supercapacitor**

Yingchao Wang,<sup>a</sup> Guochang Li,<sup>\*,a</sup> Jiachao Zhou,<sup>a</sup> Kai Tao,<sup>a</sup> Wenna Zhao,<sup>b</sup> Linli Chen,<sup>a</sup>

Lei Han<sup>\*,a</sup>

<sup>a</sup>State Key Laboratory Base of Novel Functional Materials and Preparation Science, School of Materials Science and Chemical Engineering, Ningbo University, Ningbo, Zhejiang 315211, China.

<sup>b</sup>School of Biological and Chemical Engineering, Ningbotech University, Ningbo, Zhejiang 315100, China.

\*Corresponding authors.

E-mail: [liguochang@nbu.edu.cn](mailto:liguochang@nbu.edu.cn) (G. Li); [hanlei@nbu.edu.cn](mailto:hanlei@nbu.edu.cn) (L. Han)

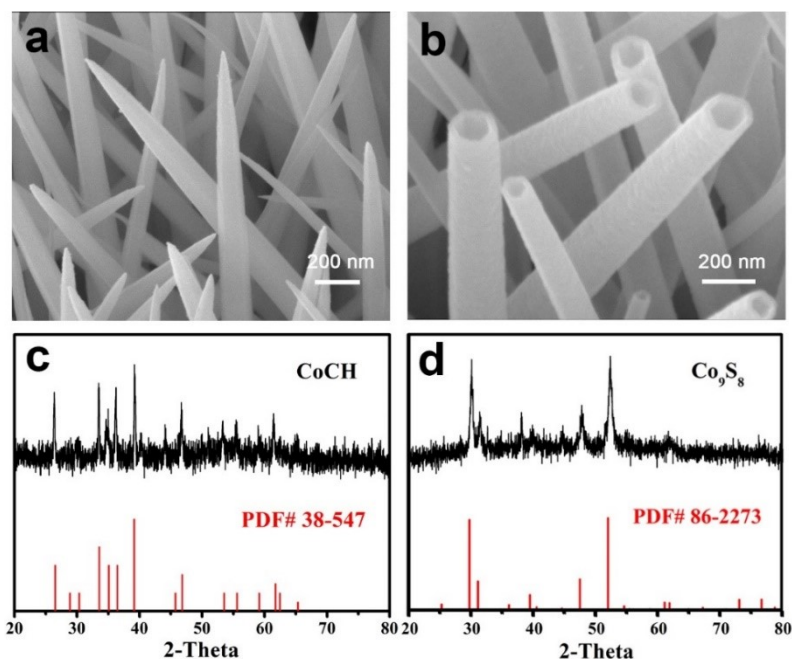

**Figure S1.** SEM images (a,b) and XRD patterns (c,d) of CoCH and Co<sub>9</sub>S<sub>8</sub>. (a,c) CoCH; (b,d) Co<sub>9</sub>S<sub>8</sub>

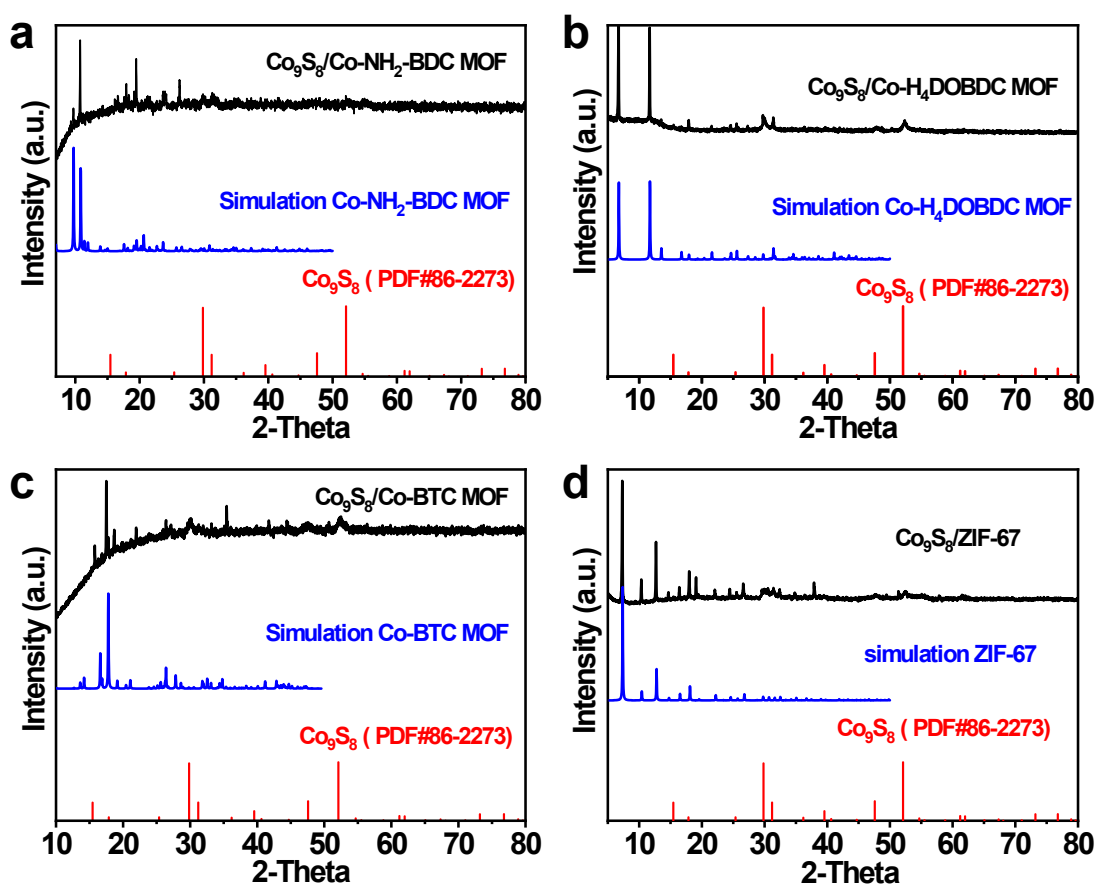

**Figure S2.** XRD patterns of the Co<sub>9</sub>S<sub>8</sub>/MOF. (a) Co<sub>9</sub>S<sub>8</sub>/Co-NH<sub>2</sub>-BDC MOF; (b) Co<sub>9</sub>S<sub>8</sub>/Co-H<sub>4</sub>DOBDC MOF; (c) Co<sub>9</sub>S<sub>8</sub>/Co-BTC MOF; (d) Co<sub>9</sub>S<sub>8</sub>/ZIF-67.

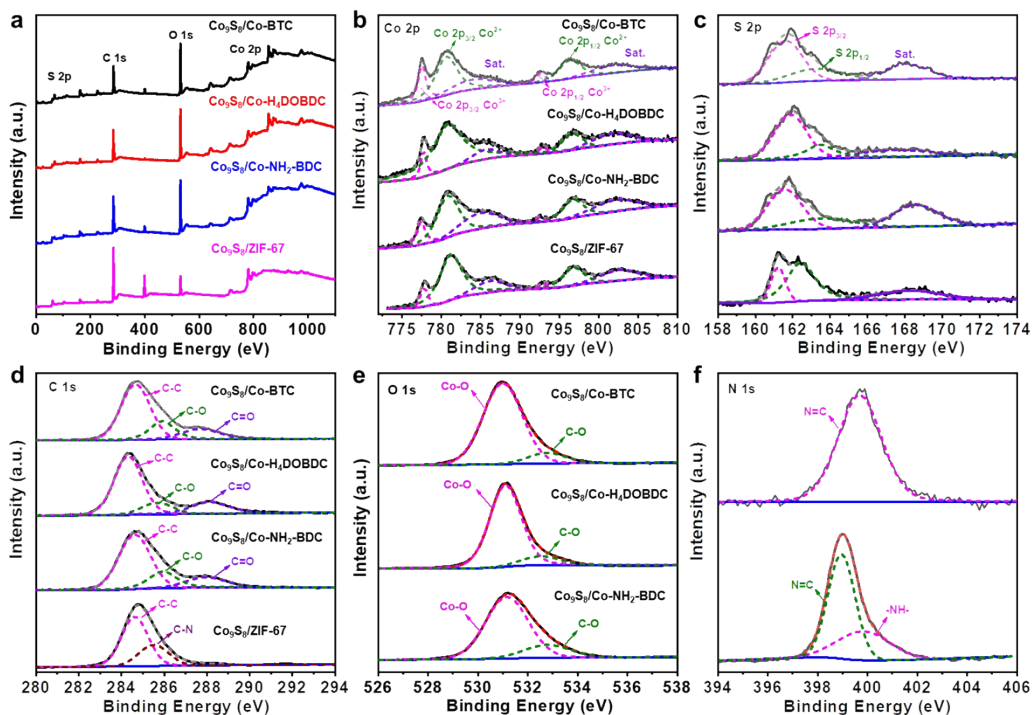

**Figure S3.** XPS spectrum of the  $\text{Co}_9\text{S}_8/\text{MOF}$ . (a) survey spectrum; (b) Co 2p; (c) S 2p (d) C 1s; (e) O 1s; (f) N 1s.

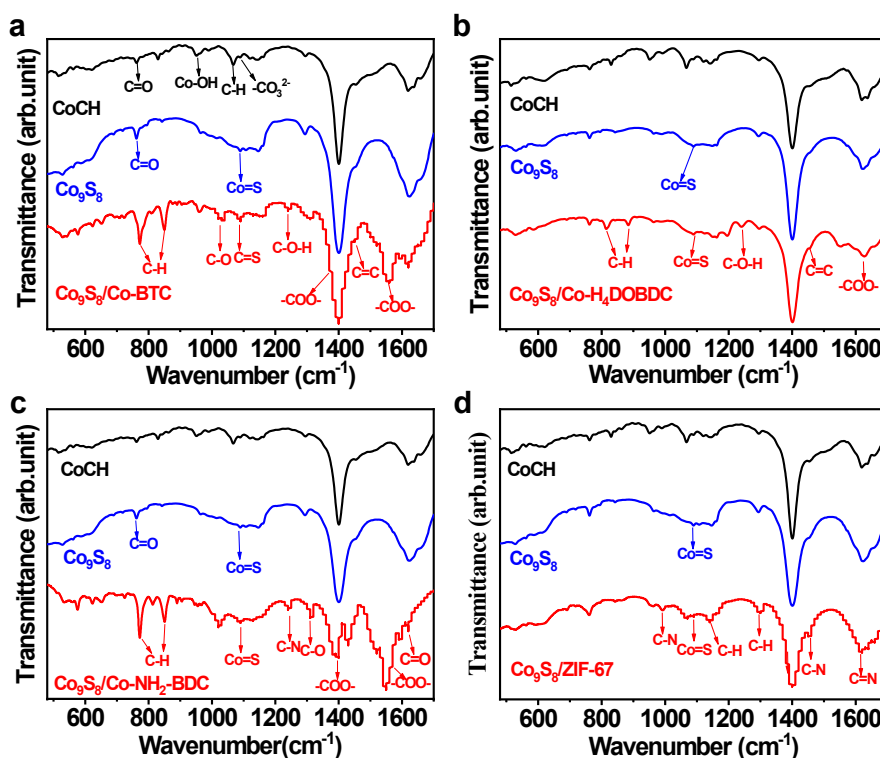

**Figure S4.** FTIR spectrum of the CoCH,  $\text{Co}_9\text{S}_8$  and  $\text{Co}_9\text{S}_8/\text{MOF}$ . (a)  $\text{Co}_9\text{S}_8/\text{Co-BTC}$  MOF; (b)  $\text{Co}_9\text{S}_8/\text{Co-H}_4\text{DOBDC}$  MOF; (c)  $\text{Co}_9\text{S}_8/\text{Co-NH}_2\text{-BDC}$  MOF; (d)  $\text{Co}_9\text{S}_8/\text{ZIF-67}$ .

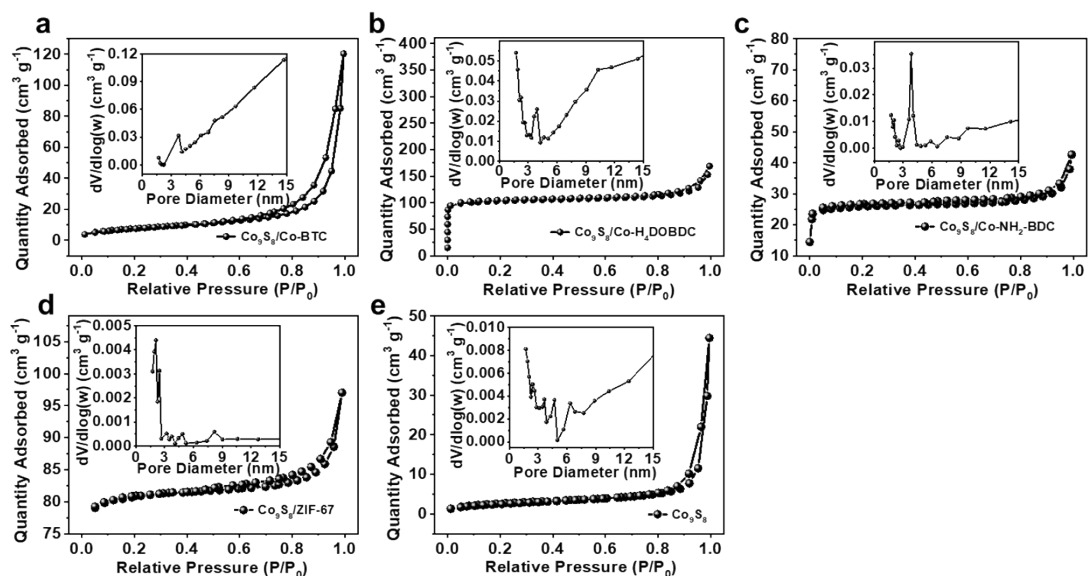

**Figure S5.**  $N_2$  adsorption-desorption isotherm and pore distribution curve of the  $Co_9S_8$ /MOF and  $Co_9S_8$ . (a)  $Co_9S_8$ /Co-BTC MOF; (b)  $Co_9S_8$ /Co- $H_4$ DOBDC MOF; (c)  $Co_9S_8$ /Co- $NH_2$ -BDC MOF; (d)  $Co_9S_8$ /ZIF-67; (e)  $Co_9S_8$ .

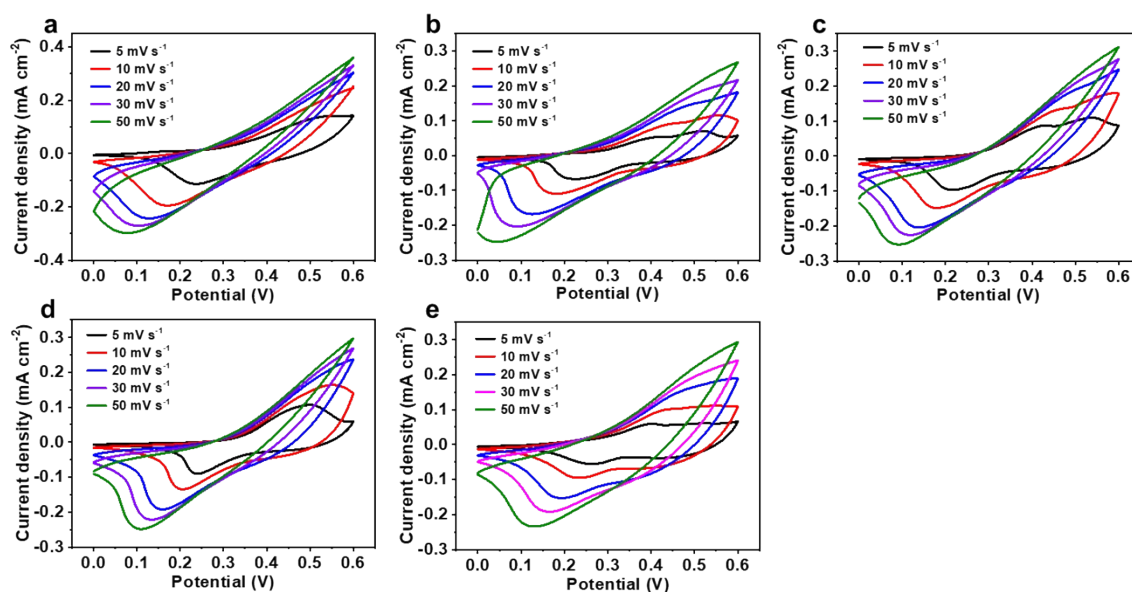

**Figure S6.** CV curves of the  $Co_9S_8$ /MOF at different scan rates. (a)  $Co_9S_8$ /Co-BDC MOF; (b)  $Co_9S_8$ /Co- $NH_2$ -BDC MOF; (c)  $Co_9S_8$ /Co- $H_4$ DOBDC MOF; (d)  $Co_9S_8$ /Co-BTC MOF; (e)  $Co_9S_8$ /ZIF-67.

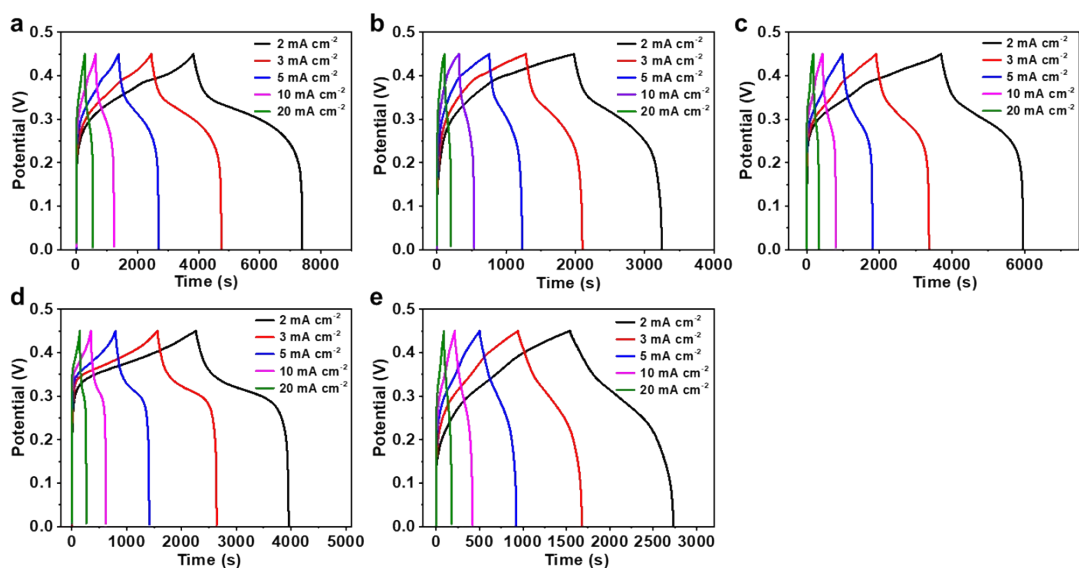

**Figure S7.** CP curves of the  $\text{Co}_9\text{S}_8/\text{MOFs}$  at different current densities. (a)  $\text{Co}_9\text{S}_8/\text{Co-BDC}$  MOF; (b)  $\text{Co}_9\text{S}_8/\text{Co-NH}_2\text{-BDC}$  MOF; (c)  $\text{Co}_9\text{S}_8/\text{Co-H}_4\text{DOBDC}$  MOF; (d)  $\text{Co}_9\text{S}_8/\text{Co-BTC}$  MOF; (e)  $\text{Co}_9\text{S}_8/\text{ZIF-67}$ .

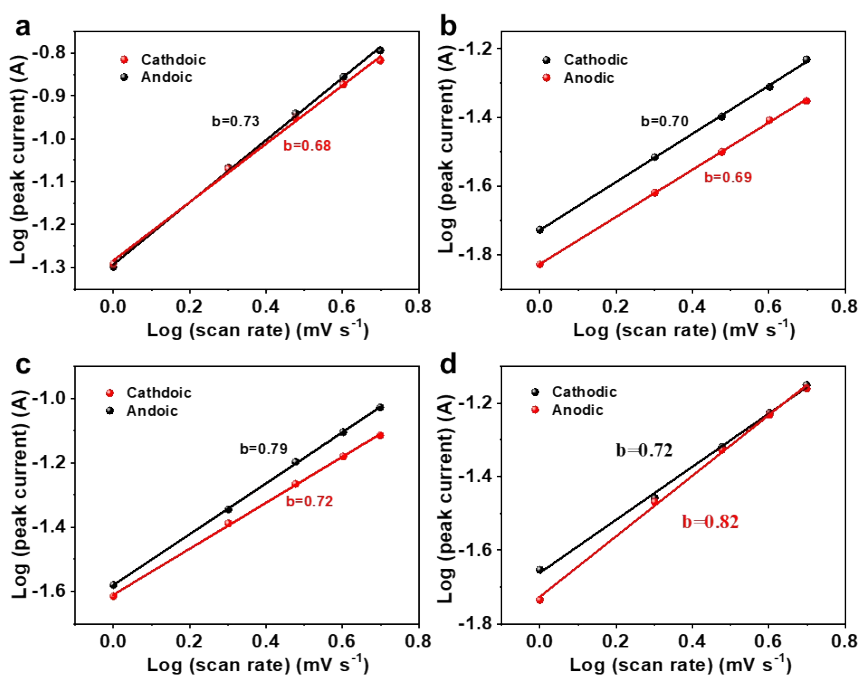

**Figure S8.** Plot of  $\nu$  versus  $\nu^{1/2}$  and  $b$  value of the  $\text{Co}_9\text{S}_8/\text{MOF}$ . (a)  $\text{Co}_9\text{S}_8/\text{Co-NH}_2\text{-BDC}$  MOF; (b)  $\text{Co}_9\text{S}_8/\text{Co-H}_4\text{DOBDC}$  MOF; (c)  $\text{Co}_9\text{S}_8/\text{Co-BTC}$  MOF; (d)  $\text{Co}_9\text{S}_8/\text{ZIF-67}$ .

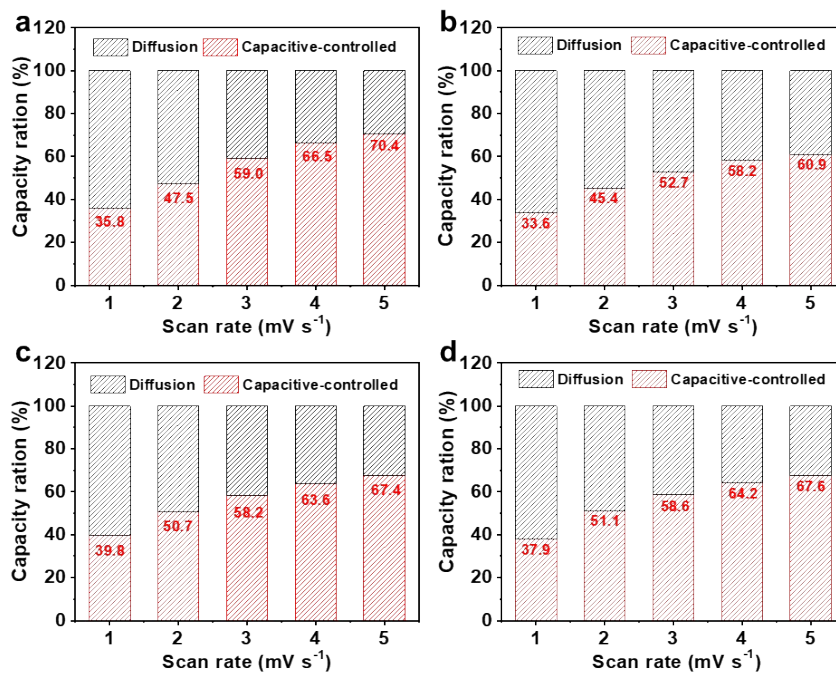

**Figure S9.** Calculated capacitive- and diffusion-controlled contribution of the Co<sub>9</sub>S<sub>8</sub>/MOF. (a) Co<sub>9</sub>S<sub>8</sub>/Co-NH<sub>2</sub>-BDC MOF; (b) Co<sub>9</sub>S<sub>8</sub>/Co-H<sub>4</sub>DOBDC MOF; (c) Co<sub>9</sub>S<sub>8</sub>/Co-BTC MOF; (d) Co<sub>9</sub>S<sub>8</sub>/ZIF-67.

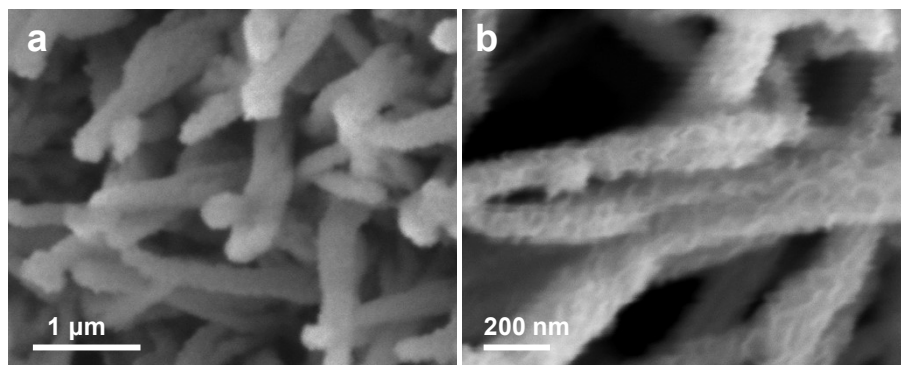

**Figure S10.** The SEM images of Co<sub>9</sub>S<sub>8</sub>/Co-BDC after the electrochemical test.



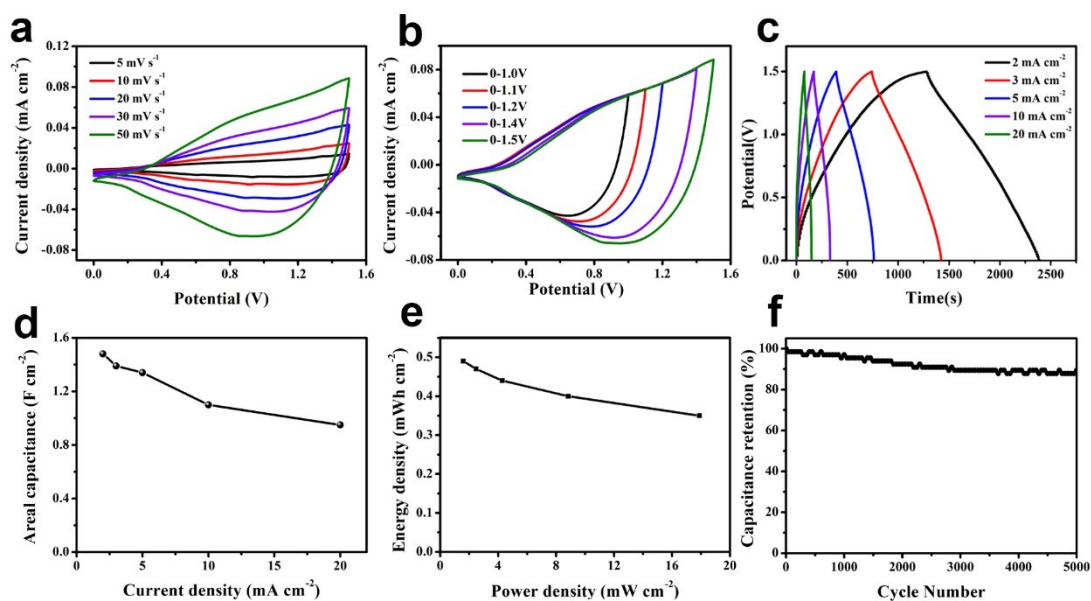

**Figure S11.** The electrochemical performance of  $\text{Co}_9\text{S}_8/\text{Co-NH}_2\text{-BDC MOF//AC ASC}$  in  $2 \text{ mol L}^{-1}$  KOH electrolyte. (a) CV curves at different scan rates; (b) CV curves at different potential; (c) GCD curves at different current densities; (d) Areal capacitance; (e) Energy density and power density; (f) Cycling performance.

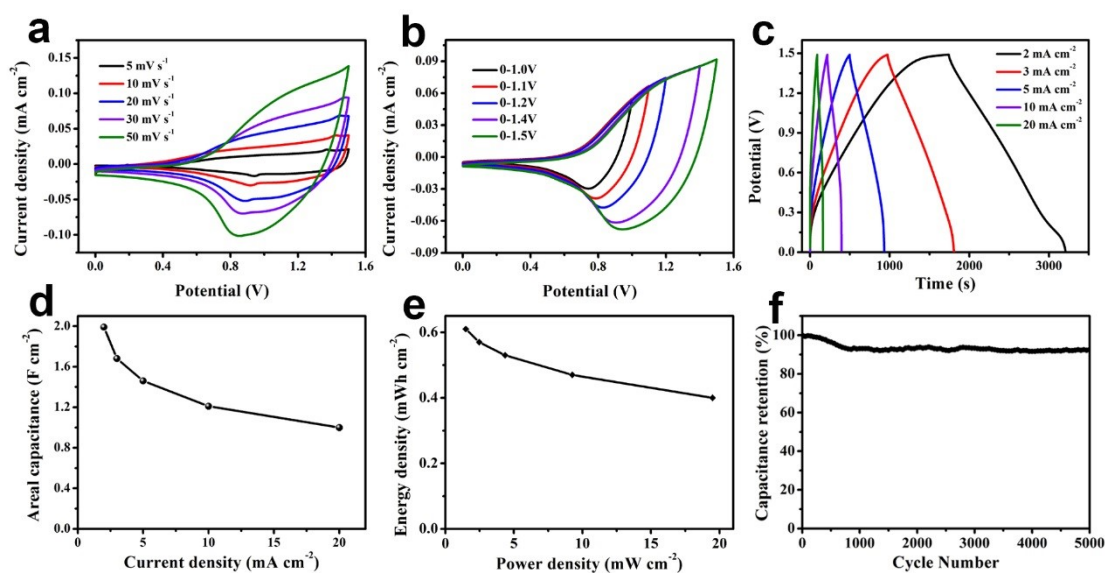

**Figure S12.** The electrochemical performance of  $\text{Co}_9\text{S}_8/\text{Co-H}_4\text{DOBDC MOF//AC ASC}$  in  $2 \text{ mol L}^{-1}$  KOH electrolyte. (a) CV curves at different scan rates; (b) CV curves at different potential; (c) GCD curves at different current densities; (d) Areal capacitance; (e) Energy density and power density; (f) Cycling performance.

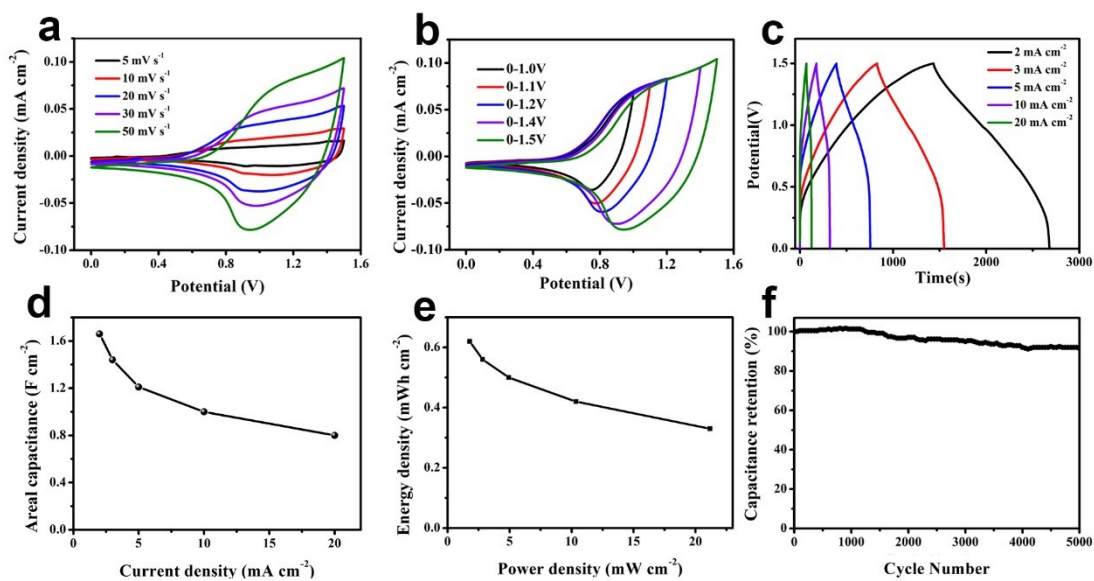

**Figure S13.** The electrochemical performance of  $\text{Co}_9\text{S}_8/\text{Co-BTC MOF//AC ASC}$  in  $2 \text{ mol L}^{-1}$  KOH electrolyte. (a) CV curves at different scan rates; (b) CV curves at different potential; (c) GCD curves at different current densities; (d) Areal capacitance; (e) Energy density and power density; (f) Cycling performance.

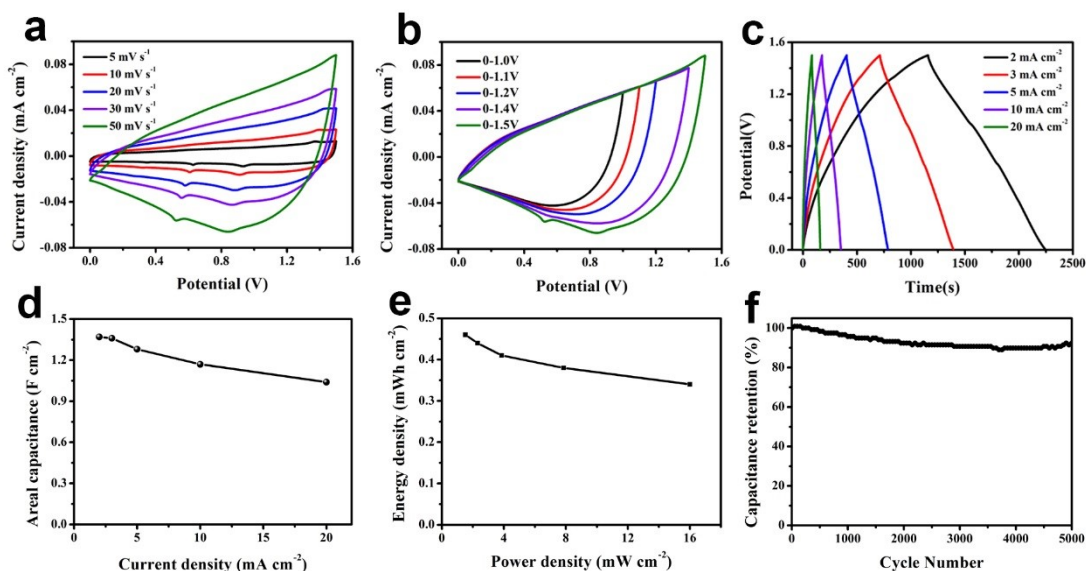

**Figure S14.** The electrochemical performance of  $\text{Co}_9\text{S}_8/\text{ZIF-67//AC ASC}$  in  $2 \text{ mol L}^{-1}$  KOH electrolyte. (a) CV curves at different scan rates; (b) CV curves at different potential; (c) GCD curves at different current densities; (d) Areal capacitance; (e) Energy density and power density; (f) Cycling performance.



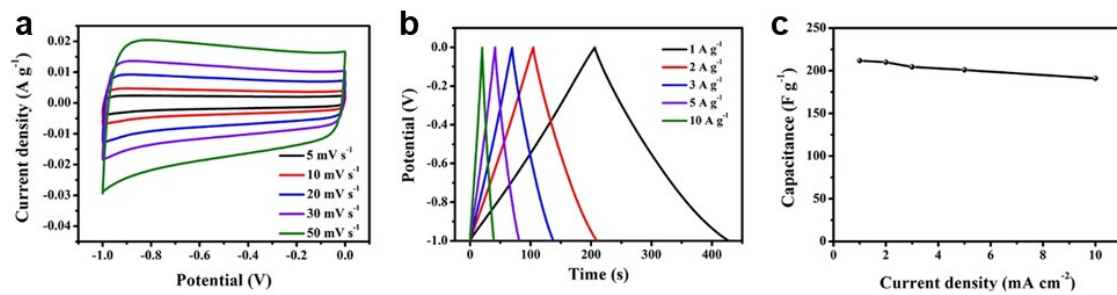

**Figure S15.** The electrochemical performance of AC in 2 mol L<sup>-1</sup> KOH electrolyte. (a) CV curves; (b) GCD curves; (c) Capacitances versus current densities.

**Table S1** The electrochemical performance of CoCH, Co<sub>9</sub>S<sub>8</sub> and Co<sub>9</sub>S<sub>8</sub>/MOF in three-electrode system.

| Electrode material                                          | Specific capacity           | Specific capacitance                              | Cycle performance | R <sub>s</sub> /R <sub>ct</sub> |
|-------------------------------------------------------------|-----------------------------|---------------------------------------------------|-------------------|---------------------------------|
| CoCH                                                        | 126.4 mAh cm <sup>-2</sup>  | 1.01F cm <sup>-2</sup> (0.455C cm <sup>-2</sup> ) | 68.60%            | 0.8957/1.052                    |
| Co <sub>9</sub> S <sub>8</sub>                              | 537.8 mAh cm <sup>-2</sup>  | 4.30F cm <sup>-2</sup> (1.94C cm <sup>-2</sup> )  | 71.33%            | 0.8316/0.219                    |
| Co <sub>9</sub> S <sub>8</sub> /Co-BDC MOF                  | 1980.0 mAh cm <sup>-2</sup> | 15.84F cm <sup>-2</sup> (4.53C cm <sup>-2</sup> ) | 87.50%            | 0.74111/0.057                   |
| Co <sub>9</sub> S <sub>8</sub> /Co-NH <sub>2</sub> -BDC MOF | 702.3 mAh cm <sup>-2</sup>  | 5.62F cm <sup>-2</sup> (7.13C cm <sup>-2</sup> )  | 93.44%            | 0.54321/0.1006                  |
| Co <sub>9</sub> S <sub>8</sub> /Co-H <sub>4</sub> DOBDC MOF | 1257.5 mAh cm <sup>-2</sup> | 10.06F cm <sup>-2</sup> (2.33C cm <sup>-2</sup> ) | 98.28%            | 0.6761/0.216                    |
| Co <sub>9</sub> S <sub>8</sub> /Co-BTC MOF                  | 938.9 mAh cm <sup>-2</sup>  | 7.51F cm <sup>-2</sup> (3.38C cm <sup>-2</sup> )  | 83.92%            | 0.6162/0.2122                   |
| Co <sub>9</sub> S <sub>8</sub> /ZIF-67                      | 661.1 mAh cm <sup>-2</sup>  | 5.29F cm <sup>-2</sup> (2.38C cm <sup>-2</sup> )  | 91.89%            | 0.6256/0.2129                   |

**Table S2** The electrochemical performance of the Co<sub>9</sub>S<sub>8</sub>/MOFs//AC ASC

| ASC                                                             | Specific capacitance    | Energy density            | Power density            | Cycle performance |
|-----------------------------------------------------------------|-------------------------|---------------------------|--------------------------|-------------------|
| Co <sub>9</sub> S <sub>8</sub> /Co-BDC MOF//AC                  | 2.49 F cm <sup>-2</sup> | 0.87 mWh cm <sup>-2</sup> | 1.68 mW cm <sup>-2</sup> | 95.44%            |
| Co <sub>9</sub> S <sub>8</sub> /Co-NH <sub>2</sub> -BDC MOF//AC | 1.66 F cm <sup>-2</sup> | 0.62 mWh cm <sup>-2</sup> | 1.78 mW cm <sup>-2</sup> | 89.39%            |
| Co <sub>9</sub> S <sub>8</sub> /Co-H <sub>4</sub> DOBDC MOF//AC | 1.99 F cm <sup>-2</sup> | 0.61 mWh cm <sup>-2</sup> | 1.48 mW cm <sup>-2</sup> | 92.48%            |
| Co <sub>9</sub> S <sub>8</sub> /Co-BTC MOF//AC                  | 1.48 F cm <sup>-2</sup> | 0.49 mWh cm <sup>-2</sup> | 1.59 mW cm <sup>-2</sup> | 91.53%            |
| Co <sub>9</sub> S <sub>8</sub> /ZIF-67//AC                      | 1.37 F cm <sup>-2</sup> | 0.46 mWh cm <sup>-2</sup> | 1.52 mW cm <sup>-2</sup> | 92.37%            |
